# Supplementary material
Source: Springer Nature journal article supplement (https://www.springermedizin.de/resource/supplementary/12874_2012_944_MOESM2_ESM.pdf/9433218)
Supplement: MOESM2 [file 9433218]

**Systematically reviewing and synthesising conversation analytic and related discursive research to inform healthcare communication practice and policy: An illustrated guide**

**Ruth H Parry and Victoria Land**

**ADDITIONAL FILE TWO:**

**Template used for recording characteristics of data and analysis for studies the in the Review of Future Talk**

|                                                                                     |                                                                                                  | Notes |
|-------------------------------------------------------------------------------------|--------------------------------------------------------------------------------------------------|-------|
| <b>Data</b>                                                                         |                                                                                                  |       |
| Overall size data collection                                                        |                                                                                                  |       |
| Number of episodes in collection(s)                                                 | Provide the number of episodes in the collection pertaining to EACH finding                      |       |
| Number of episodes from the collection that appear in the publication               | Provide the number of episodes in the collection that appear in the publication for EACH finding |       |
| Some simulation – E.g. simulated patient in interaction                             |                                                                                                  |       |
| Number of sites (e.g. two sites of the same type of setting, such as 2 HIV clinics) |                                                                                                  |       |
| Number of institutional settings                                                    |                                                                                                  |       |
| Explicit reference to practices observed in more than one individual/dyad           |                                                                                                  |       |
| Practices observed in more than one institutional group E.g. medics AND counsellors |                                                                                                  |       |

|                                                                                                                                      |  |  |
|--------------------------------------------------------------------------------------------------------------------------------------|--|--|
| <b>Analysis</b>                                                                                                                      |  |  |
| Predominantly examines more than only one party's turns (i.e. attends to sequence)                                                   |  |  |
| Examines more than only topical/semantic content – i.e. attention to some aspects of grammatical, pragmatic, and/or prosodic content |  |  |
| Includes examination of aspects of sequential environment in which practice(s) occur(s)                                              |  |  |
| Includes examination of aspects of turn and/or sequence design                                                                       |  |  |
| Includes examination of interactional effects/consequences                                                                           |  |  |
| Includes examination of deviant cases                                                                                                |  |  |
| Are central/key analytic claims supported by direct quote from or references to the data?<br>NO/SOMETIMES/OFTEN                      |  |  |
| Reviewer's judgement of degree to which analysis is fine grained<br>NOT/MODERATELY/VERY                                              |  |  |
| Are established analytic findings used as 'tools' in the analysis?<br>NO/OCCASIONALLY/<br>CONSIDERABLY                               |  |  |
